# Supplementary material
Source: Springer Nature journal article supplement (https://www.springermedizin.de/resource/supplementary/12936_2014_3535_MOESM2_ESM.pdf/9545862)

**Proportion of patients with parasites**

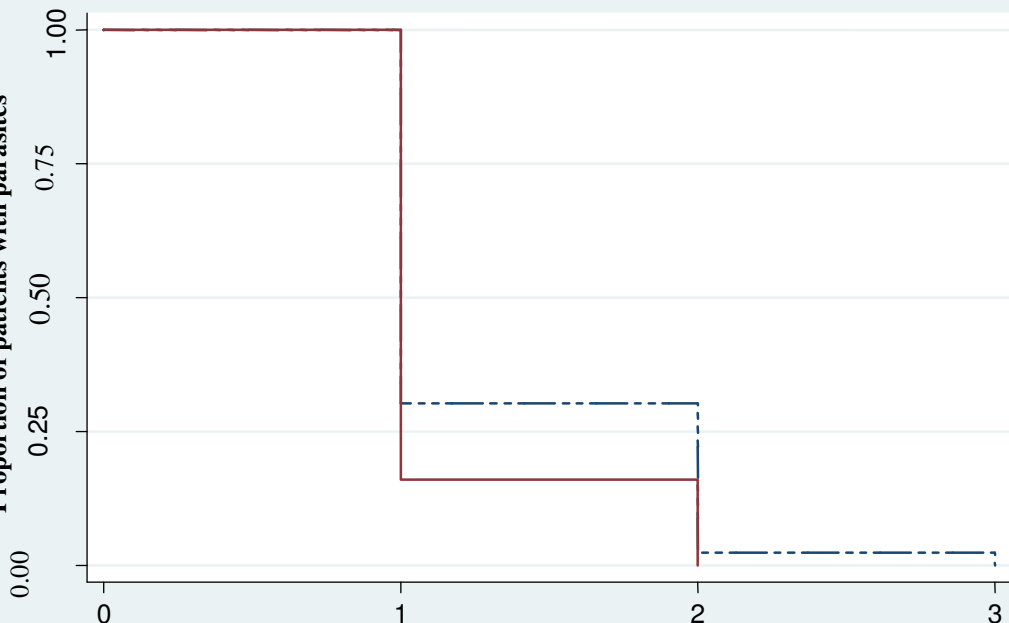

**Days of follow-up**

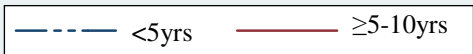

Supplement: MOESM2 [file 9545862]
